# Supplementary material for: An eco-friendly route for template-free synthesis of high specific surface area mesoporous CeO2 powders and their adsorption for acid orange 7
Source: Royal Society of Chemistry journal article supplement (doi:10.1039/c9ra02294e), 2019-01-01
Supplement: c9ra02294e1.pdf [file c9ra02294e1.pdf]

## Supporting Information

### **An eco-friendly route for template-free synthesis of high specific surface area mesoporous CeO<sub>2</sub> powders and their adsorption for acid orange 7**

Yaohui Xu,<sup>a</sup> Ruixing Li<sup>\*b</sup> and Yang Zhou<sup>\*c</sup>

<sup>a</sup> *School of Physics and Electronic Engineering, Laboratory for Functional Materials, Leshan Normal University, Leshan, Sichuan 614004, China*

<sup>b</sup> *Key Laboratory of Aerospace Materials and Performance (Ministry of Education), School of Materials Science and Engineering, Beihang University, Beijing 100191, China*

<sup>c</sup> *School of Textile Science and Engineering, National Engineering Laboratory for Advanced Yarn and Clean Production, Wuhan Textile University, Wuhan, 430200, China*

Corresponding author:

Ruixing Li, Ph.D.,  
Professor

School of Materials Science and Engineering, Beihang University,  
(formerly *Beijing University of Aeronautics and Astronautics*)  
Xueyuanlu No.37, School of materials science and engineering, Beijing 100191, China  
TEL / FAX: 86-10-8231-6500  
E-mail: ruixingli@yahoo.com

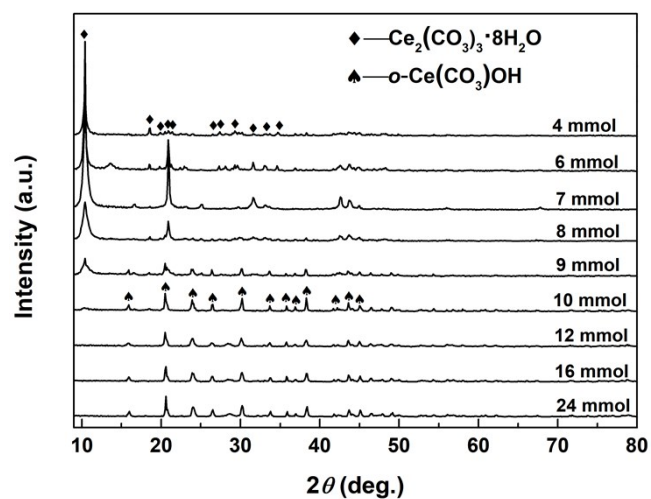

**Fig. S1** XRD spectra of the precursor obtained after adding different amounts of  $(\text{NH}_4)_2\text{CO}_3$  to  $\text{Ce}^{3+}$  aqueous solution.
